# Supplementary material
Source: PubMed Central journal article supplement (PMC3324985)
Supplement: la203093u_si_001.pdf [file la203093u_si_001.pdf]

Electronic Supporting Information (ESI)

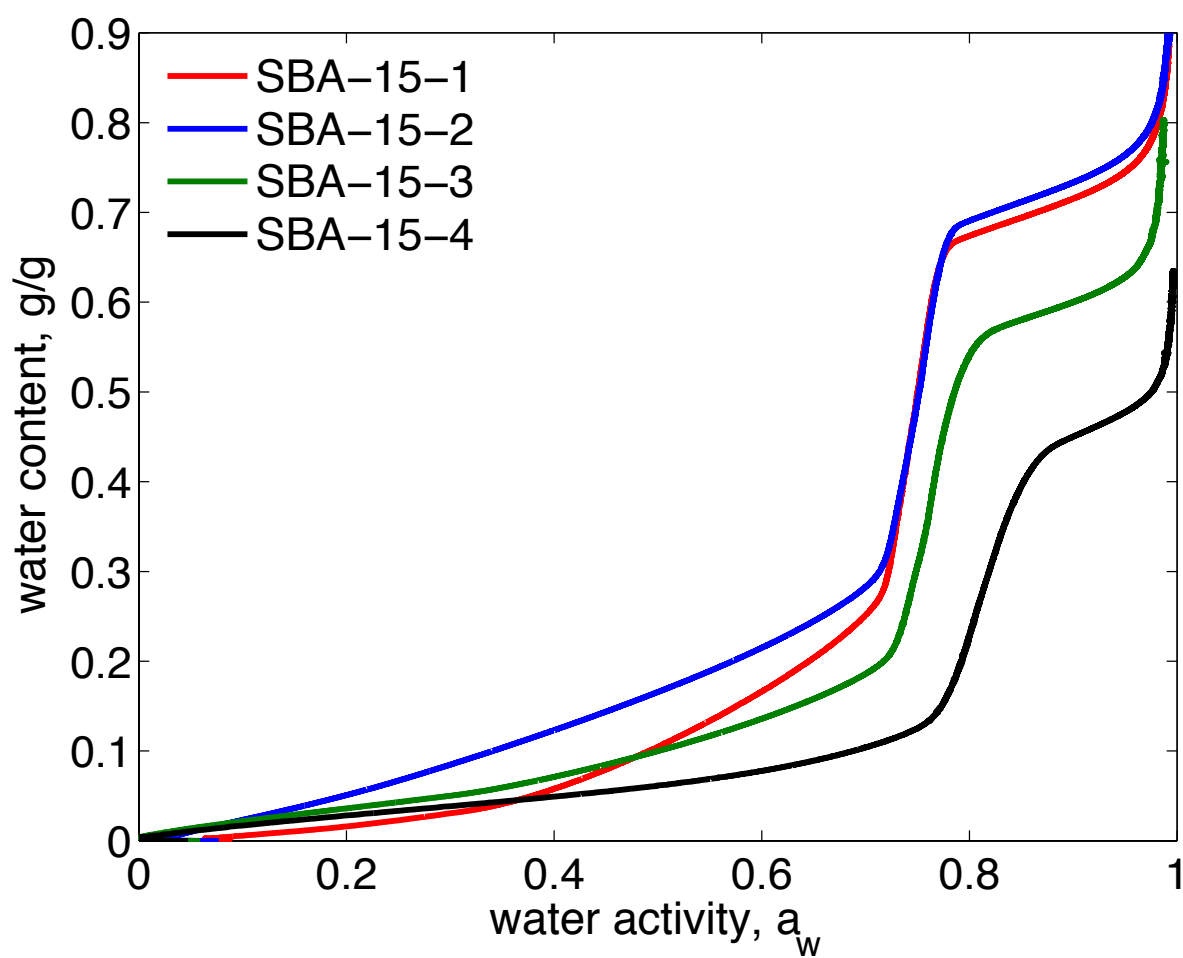

**Figure S1:** Water sorption isotherms of SBA-15-1 (red), SBA-15-2 (blue), SBA-15-3 (green) and SBA-15-4 (black) plotted against the water activity  $a_w$
